# Supplementary material for: Enhanced Mechanical Properties and Anti–Inflammation of Poly(L–Lactic Acid) by Stereocomplexes of PLLA/PDLA and Surface–Modified Magnesium Hydroxide Nanoparticles
Source: MDPI journal article supplement (doi:10.3390/polym14183790), 2022-09-10
Supplement: s1 [file s1]

# Supplementary Information

## Enhanced Mechanical Properties and Anti-Inflammation of Poly(L-Lactic Acid) by Stereocomplexes of PLLA/PDLA and Surface-Modified Magnesium Hydroxide Nanoparticles

Seung-Woon Baek <sup>1,2,3,†</sup>, Jun Hyuk Kim <sup>1,†</sup>, Duck Hyun Song <sup>1</sup>, Da-Seul Kim <sup>1,4</sup>, Chun Gwon Park <sup>2,3,\*</sup> and Dong Keun Han <sup>1,\*</sup>

<sup>1</sup> Department of Biomedical Science, CHA University, 335 Pangyo-ro, Bundang-gu, Seongnam-si 13488, Korea

<sup>2</sup> Department of Biomedical Engineering, SKKU Institute for Convergence, Sungkyunkwan University (SKKU), 2066 Seobu-ro, Jangan-gu, Suwon-si 16419, Korea

<sup>3</sup> Department of Intelligent Precision Healthcare Convergence, SKKU Institute for Convergence, Sungkyunkwan University (SKKU), 2066 Seobu-ro, Jangan-gu, Suwon-si 16419, Korea

<sup>4</sup> School of Integrative Engineering, Chung-Ang University, 84 Heukseok-ro, Dongjak-gu, Seoul 06974, Korea

\* Correspondence: chunpark@skku.edu (C.G.P.); dkhan@cha.ac.kr (D.K.H.)

† These authors contributed equally to this work.

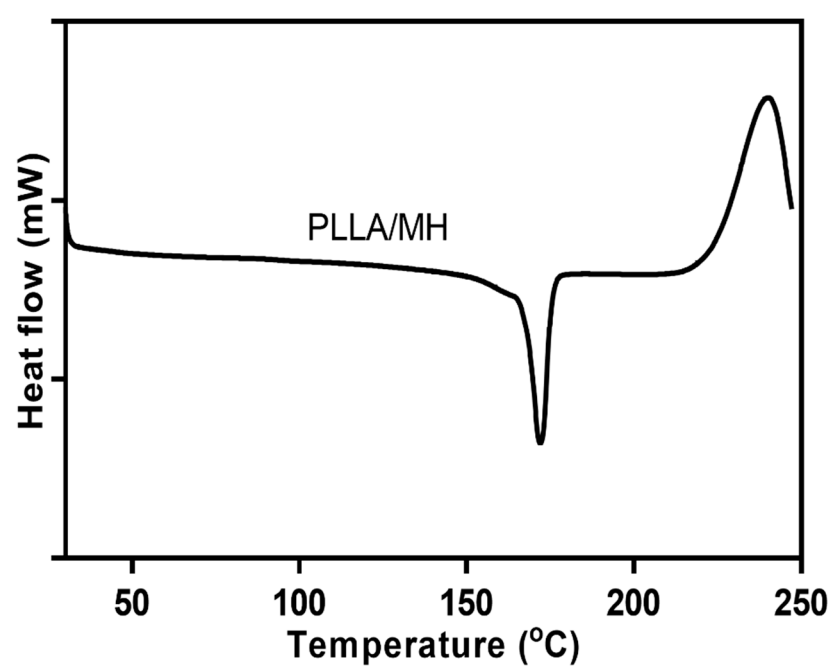

**Figure S1.** DSC thermogram of the PLLA/MH.

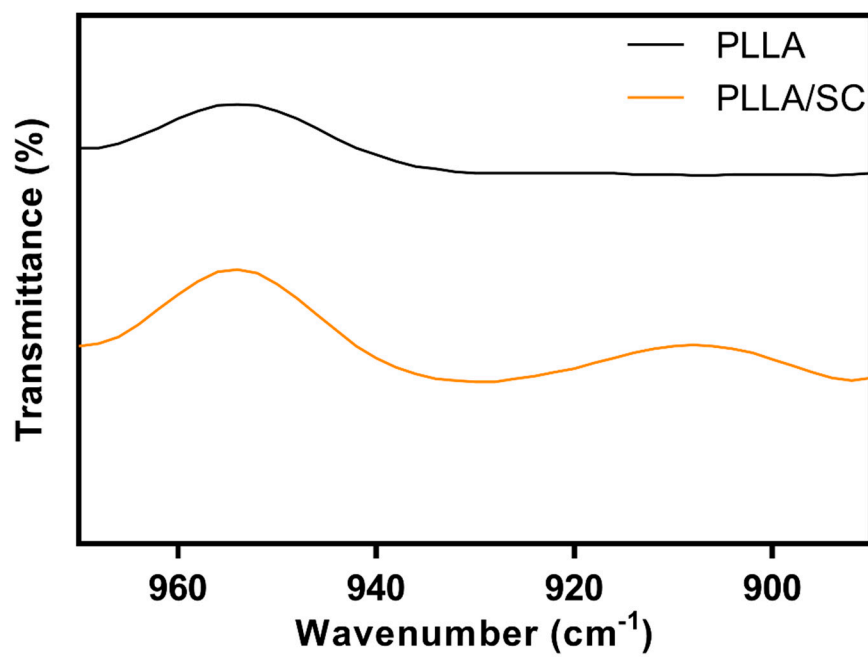

**Figure S2.** ATR-FTIR spectra of the PLLA and PLLA/SC.

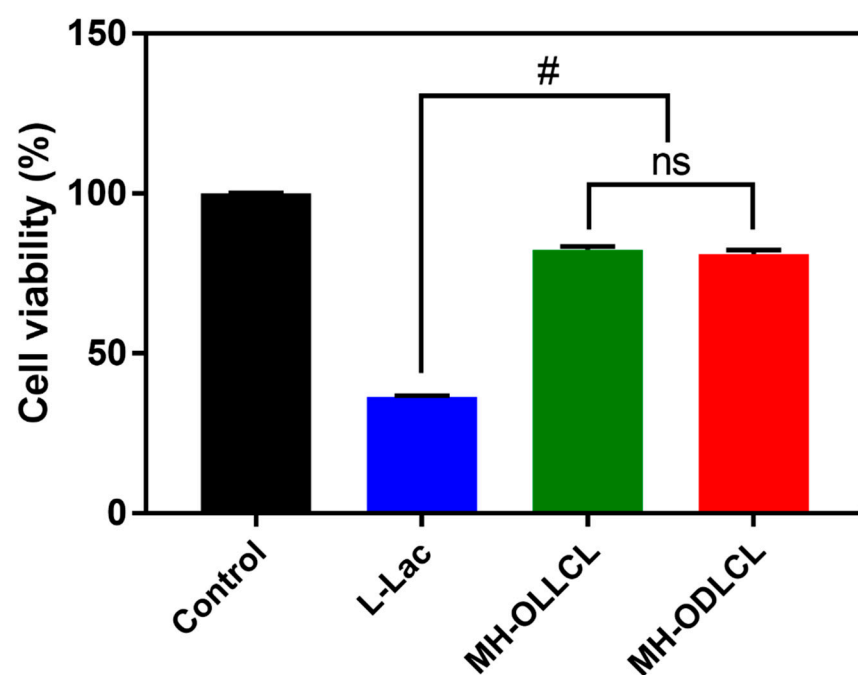

**Figure S3.** Cell viability of HCAEC in 12 mM L-Lac with surface-modified MH at a concentration of 10 phr for 24 h ( $*p<0.05$ ,  $**p<0.01$ ,  $***p<0.001$ ,  $\#p<0.0001$ ).
